# Supplementary material for: Lifting the lid on unborn lethal Mendelian phenotypes through exome sequencing
Source: PubMed Central journal article supplement — Genet Med. 2012 Oct 4;15(4):307–9. doi: 10.1038/gim.2012.130 (PMC3908556; doi:10.1038/gim.2012.130), 2012-10-04
Supplement: gim2012130x1.pdf [file gim2012130x1.pdf]

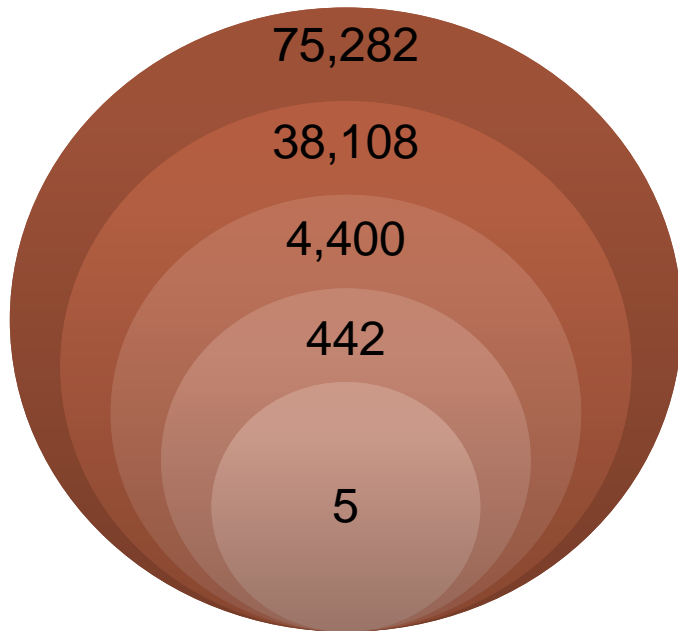

- Total exome variants
- Homozygous
- Coding/splicing
- Within the autozygome
- Novel (absent in dbSNP and 200 Saudi exomes)
